# Supplementary material
Source: PubMed Central journal article supplement (PMC3093860)

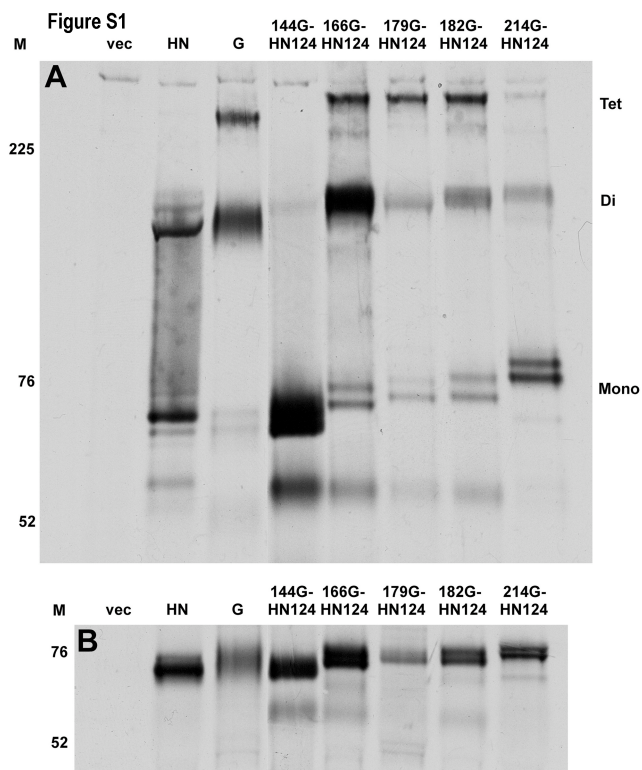

Supplement: supp_M111.233965_jbc.M111.233965-1.pdf [file supp_M111.233965_jbc.M111.233965-1.pdf]
